# Supplementary material for: Mitigation of high-fat diet-induced hepatic steatosis by thyme (Thymus quinquecostatus Celak) polyphenol-rich extract (TPE): insights into gut microbiota modulation and bile acid metabolism
Source: Royal Society of Chemistry journal article supplement (doi:10.1039/d3fo05235d), 2024-01-01
Supplement: d3fo05235d2.pdf [file d3fo05235d2.pdf]

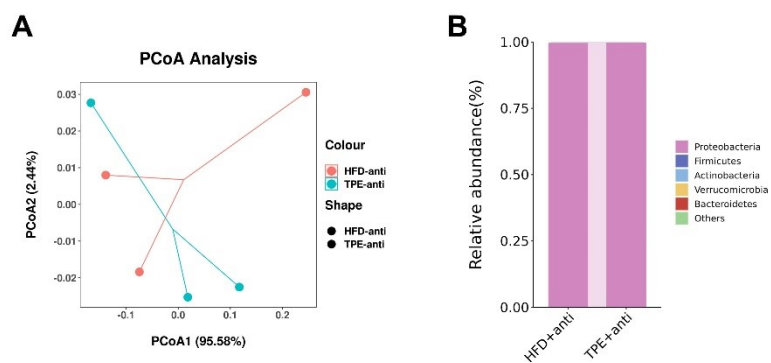

**Figure S2.** Antibiotics intervention on TPE treatment modulated gut microbiota. (A) Principal coordinates analysis (PCoA) based on the OTUs level. (B) Composition of gut microbiota at the phylum level. The data are expressed as the means  $\pm$  SEM (n = 4). Different letters mean significant difference in different treatment groups ( $p < 0.05$ ).
