# Supplementary material for: Mitigation of high-fat diet-induced hepatic steatosis by thyme (Thymus quinquecostatus Celak) polyphenol-rich extract (TPE): insights into gut microbiota modulation and bile acid metabolism
Source: Royal Society of Chemistry journal article supplement (doi:10.1039/d3fo05235d), 2024-01-01
Supplement: d3fo05235d3.pdf [file d3fo05235d3.pdf]

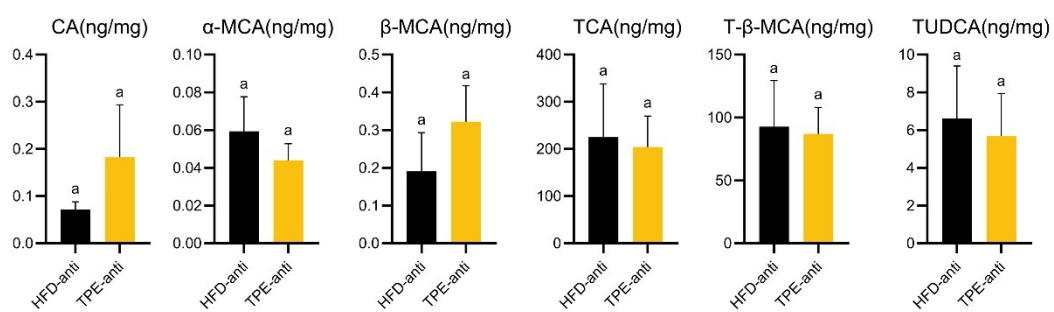

**Figure S3.** Effect of TPE adding antibiotics on fecal bile acid monomers. The data are expressed as the means  $\pm$  SEM ( $n = 3$ ). Different letters mean significant difference in different treatment groups ( $p < 0.05$ ).
