# Supplementary material for: Mitigation of high-fat diet-induced hepatic steatosis by thyme (Thymus quinquecostatus Celak) polyphenol-rich extract (TPE): insights into gut microbiota modulation and bile acid metabolism
Source: Royal Society of Chemistry journal article supplement (doi:10.1039/d3fo05235d), 2024-01-01
Supplement: d3fo05235d4.xlsx [file d3fo05235d4.xlsx]

## Sheet: Fig. 1
Fig. 1A
Serum TBA				Liver TBA				Fecal TBA
ND	HFD	TPE		ND	HFD	TPE		ND	HFD	TPE
20.28	16.08	19.23		0.96853	1.171	1.388		824.068	470.008	1047.59
13.29	24.48	13.29		0.98951	1.091	1.643		513.005	591.351	950.878
19.23	30.77	12.24		1.42308	1.15	1.416		1205.81	355.621	678.475
14.34	15.03	12.94		1.26224	1.531	1.434
26.92	26.57	14.69		1.51049	1.395	1.329
17.83	24.48	19.58		1.15734	1.552	1.332
Fig. 1B
PCOA analysis of fecal BAs
	ND_1	ND_2	ND_3	HFD_1	HFD_2	HFD_3	TPE_1	TPE_2	TPE_3
ND_1	0	0.280492	0.124989	0.341183	0.373496	0.404672	0.345319	0.341659	0.208002
ND_2	0.280492	0	0.349176	0.266734	0.294287	0.279313	0.251126	0.213543	0.228421
ND_3	0.124989	0.349176	0	0.283988	0.341675	0.358661	0.329963	0.339472	0.246903
HFD_1	0.341183	0.266734	0.283988	0	0.186906	0.223261	0.300792	0.314028	0.320734
HFD_2	0.373496	0.294287	0.341675	0.186906	0	0.138323	0.22038	0.240239	0.388567
HFD_3	0.404672	0.279313	0.358661	0.223261	0.138323	0	0.157452	0.178935	0.358665
TPE_1	0.345319	0.251126	0.329963	0.300792	0.22038	0.157452	0	0.0560318	0.295064
TPE_2	0.341659	0.213543	0.339472	0.314028	0.240239	0.178935	0.0560318	0	0.246656
TPE_3	0.208002	0.228421	0.246903	0.320734	0.388567	0.358665	0.295064	0.246656	0
Fig. 1C
Primary BAs
	α-MCA	β-MCA	CDCA	CA	TCA	T-β-MCA	UDCA	γ-MCA	Others
ND	68.5234	53.2197	21.9291	17.3923	3.35167	1.78948	5.15226	2.07475	0.488769
HFD	35.4153	29.206	20.207	55.1197	3.10837	0.779879	7.25849	0.559013	0.304587
TPE	109.999	91.9084	27.35	66.8934	11.3752	4.53988	11.5977	4.03837	1.23703
Secondery BAs
	DCA	12-KLCA	HDCA	AlloCA	LCA	7-KDCA	ApoCA	IsoLCA	Others
ND	183.517	211.875	87.1394	37.7702	61.4831	21.4898	45.9087	14.493	10.0307
HFD	131.139	46.9906	56.2881	8.02515	19.0218	27.1772	14.811	2.29778	14.6178
TPE	174.294	37.8429	94.7718	88.8949	51.1823	71.2827	18.5359	5.92045	20.6506
Fig. 1D
Primary/Secondary
ND	HFD	TPE
0.197839	0.597085	0.560153
0.355738	0.526295	0.580126
0.262944	0.27293	0.627483
Fig. 1E
Conjugated BAs
	TCA	T-β-MCA	TDCA	GDCA	TCDCA	TUDCA	GLCA	Others
ND	3.35167	1.78948	1.55839	1.05994	0.411822	0.373	0.268763	0.547991
HFD	3.10837	0.779879	0.443962	0.305561	0.211148	0.30304	0.043668	0.534038
TPE	11.3752	4.53988	1.71573	1.08277	0.822418	0.595454	0.146558	1.29522
Unconjugated BAs
	12-KLCA	DCA	HDCA	α-MCA	LCA	β-MCA	ApoCA	AlloCA	CDCA	7-KDCA	CA	Others
ND	211.875	183.517	87.1394	68.5234	61.4831	53.2197	45.9087	37.7702	21.9291	21.4898	17.3923	28.0196
HFD	46.9906	131.139	56.2881	35.4153	19.0218	29.206	14.811	8.02515	20.207	27.1772	55.1197	23.1962
TPE	37.8429	174.294	94.7718	109.999	51.1823	91.9084	18.5359	88.8949	27.35	71.2827	66.8934	37.786
Fig. 1F
Conjugated/Unconjugated
ND	HFD	TPE
0.011265	0.010173	0.026779
0.0155	0.010347	0.018757
0.009268	0.018326	0.030202

## Sheet: Fig. 2
CA
ND	HFD	TPE
19.601	73.7475	53.153
27.6078	82.5512	83.2827
23.6044	78.1493	64.2444
CDCA
ND	HFD	TPE
15.8051	16.984	29.3529
18.4794	23.6003	28.39
31.5027	20.0367	24.307
UDCA
ND	HFD	TPE
4.83677	9.78453	14.969
4.28963	10.5777	18.5253
6.33038	10.1811	11.4127
α-MCA
ND	HFD	TPE
59.8322	38.0227	146.035
47.3121	43.4276	102.713
98.4258	24.7958	81.2478
β-MCA
ND	HFD	TPE
43.2862	33.3558	114.86
38.456	38.8285	99.4501
77.917	15.4336	61.4148
TCA
ND	HFD	TPE
3.73219	2.45056	15.6801
3.81627	3.07122	8.76579
2.50655	3.80333	9.67964
T-β-MCA
ND	HFD	TPE
1.55309	0.575265	5.76691
1.1372	0.8328	3.21633
2.67815	0.931572	4.63641
LCA
ND	HFD	TPE
70.7352	14.1086	72.8953
69.4425	19.8267	61.4083
44.2717	23.1302	19.2433
DCA
ND	HFD	TPE
175.885	115.88	180.066
174.541	172.51	173.61
200.126	105.027	169.204
TDCA
ND	HFD	TPE
1.24345	0.473843	1.42371
0.80246	0.53728	1.36965
2.62926	0.320764	2.35384
TUDCA
ND	HFD	TPE
0.407813	0.265963	0.736669
0.319583	0.317319	0.591159
0.391603	0.325839	0.458534
GLCA
ND	HFD	TPE
0.344298	0.040431	0.19684
0.288069	0.051687	0.164852
0.173921	0.038884	0.077983
GDCA
ND	HFD	TPE
0.828194	0.279109	1.21222
0.568043	0.415562	1.38168
1.78359	0.222013	0.654416

## Sheet: Fig. 3
Fig. 3A
Liver				Ileum
Cyp7a1				Asbt
ND	HFD	TPE		ND	HFD	TPE
1	0.46	1.89		1	1.37	0
2.33	0.77	1.96		0.04	1.08	0.14
1.56	0.57	2.23		0.43	1.1	0.03
Cpy27a1				Ibabp
ND	HFD	TPE		ND	HFD	TPE
1	0.97	1.82		1	5.04	0.22
0.97	1.76	3.26		0.28	3.43	0.12
1	0.69	2.64		2.43	4.05	0.96
Bsep				Ost-α
ND	HFD	TPE		ND	HFD	TPE
1	0.62	0.97		1	4.37	0.19
1.03	0.51	1.7		0.81	2.97	0.28
1.09	0.33	0.97		1.96	2.25	1.01
Ntpc				Ost-β
ND	HFD	TPE		ND	HFD	TPE
1	0.81	1.81		1	2.57	0.11
0.75	0.84	3.31		0.53	1.51	0.27
1.36	0.61	1.85		1.3	1.33	0.23
Fgfr4				Fgf15
ND	HFD	TPE		ND	HFD	TPE
1	1.67	0.91		1	0.48	0.59
0.31	1.65	1.11		0.77	1.77	0.57
0.55	1.2	0.81		0.81	0.58	0.65
Shp				Fxr
ND	HFD	TPE		ND	HFD	TPE
1	0.24	1.6		1	0.48	0.59
0.41	0.87	3.68		0.77	1.77	0.57
1.6	0.57	1.63		0.81	0.58	0.65
Fxr
ND	HFD	TPE
1	0.49	1.89
1.21	0.91	1.4
0.81	0.89	0.94

## Sheet: Fig. 4
Fig. 4A
ACE Index				Shannon Index				Observed Species
ND	HFD	TPE		ND	HFD	TPE		ND	HFD	TPE
1014.45	744.291	1223.34		4.84485	4.10391	5.38533		806	584	1007
1219.11	745.437	1163.79		5.62854	4.02762	6.0519		991	566	931
919.115	808.978	1220.29		4.35737	4.04872	5.68505		698	606	1049
877.505	924.989	1043.7		4.21857	4.01574	4.87577		670	652	832
1230.91	945.73	1415.83		5.93952	4.64758	5.49494		1061	690	1182
1228.59	794.274	1170.27		5.96469	4.27144	4.58512		1024	589	889
Fig. 4B
PCOA
Index	ND_1	ND_2	ND_3	ND_4	ND_5	ND_6	HFD_1	HFD_2	HFD_3	HFD_4	HFD_5	HFD_6	TPE_1	TPE_2	TPE_3	TPE_4	TPE_5	TPE_6
ND_1	0	0.548634	0.506345	0.572505	0.561293	0.530671	0.588521	0.568463	0.603862	0.601817	0.60226	0.569453	0.621109	0.673065	0.66359	0.6218	0.628656	0.650364
ND_2	0.548634	0	0.499584	0.605808	0.551119	0.557454	0.565767	0.584835	0.544931	0.590368	0.588733	0.579006	0.646491	0.657634	0.648763	0.62397	0.63653	0.634005
ND_3	0.506345	0.499584	0	0.562602	0.530206	0.517194	0.577434	0.560091	0.573527	0.588393	0.610474	0.572219	0.627977	0.630832	0.631542	0.59069	0.627274	0.616386
ND_4	0.572505	0.605808	0.562602	0	0.596023	0.599586	0.622813	0.629767	0.611019	0.624347	0.639442	0.595782	0.627047	0.638602	0.640485	0.62221	0.622737	0.60226
ND_5	0.561293	0.551119	0.530206	0.596023	0	0.480756	0.569679	0.554514	0.557492	0.570935	0.611865	0.573684	0.636003	0.655322	0.63547	0.605602	0.616923	0.639305
ND_6	0.530671	0.557454	0.517194	0.599586	0.480756	0	0.57459	0.574496	0.561517	0.570788	0.603189	0.573788	0.640303	0.657661	0.654429	0.618832	0.612519	0.642529
HFD_1	0.588521	0.565767	0.577434	0.622813	0.569679	0.57459	0	0.507401	0.48866	0.521861	0.526281	0.523281	0.644734	0.608714	0.6035	0.592871	0.616835	0.583874
HFD_2	0.568463	0.584835	0.560091	0.629767	0.554514	0.574496	0.507401	0	0.514653	0.519121	0.551833	0.518787	0.641912	0.637111	0.645874	0.617335	0.623157	0.637941
HFD_3	0.603862	0.544931	0.573527	0.611019	0.557492	0.561517	0.48866	0.514653	0	0.558373	0.529336	0.527212	0.650113	0.612771	0.608198	0.590062	0.599799	0.60574
HFD_4	0.601817	0.590368	0.588393	0.624347	0.570935	0.570788	0.521861	0.519121	0.558373	0	0.529596	0.49752	0.585201	0.573653	0.573883	0.540605	0.574394	0.572966
HFD_5	0.60226	0.588733	0.610474	0.639442	0.611865	0.603189	0.526281	0.551833	0.529336	0.529596	0	0.523578	0.617836	0.603314	0.593315	0.586538	0.607833	0.596911
HFD_6	0.569453	0.579006	0.572219	0.595782	0.573684	0.573788	0.523281	0.518787	0.527212	0.49752	0.523578	0	0.599512	0.587954	0.558844	0.554217	0.572618	0.553042
TPE_1	0.621109	0.646491	0.627977	0.627047	0.636003	0.640303	0.644734	0.641912	0.650113	0.585201	0.617836	0.599512	0	0.518984	0.541777	0.501862	0.525825	0.525265
TPE_2	0.673065	0.657634	0.630832	0.638602	0.655322	0.657661	0.608714	0.637111	0.612771	0.573653	0.603314	0.587954	0.518984	0	0.497418	0.480607	0.548601	0.479083
TPE_3	0.66359	0.648763	0.631542	0.640485	0.63547	0.654429	0.6035	0.645874	0.608198	0.573883	0.593315	0.558844	0.541777	0.497418	0	0.446636	0.533779	0.489677
TPE_4	0.6218	0.62397	0.59069	0.62221	0.605602	0.618832	0.592871	0.617335	0.590062	0.540605	0.586538	0.554217	0.501862	0.480607	0.446636	0	0.502826	0.476871
TPE_5	0.628656	0.63653	0.627274	0.622737	0.616923	0.612519	0.616835	0.623157	0.599799	0.574394	0.607833	0.572618	0.525825	0.548601	0.533779	0.502826	0	0.514822
TPE_6	0.650364	0.634005	0.616386	0.60226	0.639305	0.642529	0.583874	0.637941	0.60574	0.572966	0.596911	0.553042	0.525265	0.479083	0.489677	0.476871	0.514822	0
Fig. 4C
Composition of gut microbiota at the phylum level
	Firmicutes	Bacteroidetes	Actinobacteria	Proteobacteria	Verrucomicrobia	Epsilonbacteraeota	Cyanobacteria	Others
ND	0.54115	0.304275	0.017911	0.008768	0.119854	0.000168	0.000133	0.007741
HFD	0.769073	0.08868	0.124447	0.009659	0.000119	0.00061	0.000559	0.006853
TPE	0.616875	0.31652	0.04631	0.012163	0.000162	2.21e-05	1.08e-05	0.007937
Fig. 4D
Firmicutes				Bacteroidetes				Actinobacteria				Verrucomicrobia
ND	HFD	TPE		ND	HFD	TPE		ND	HFD	TPE		ND	HFD	TPE
0.491583	0.736494	0.732284		0.278167	0.029995	0.134932		0.014645	0.214014	0.032134		0.20225	9.57e-05	0.000137
0.623823	0.698314	0.651134		0.14353	0.216132	0.192384		0.012313	0.0638	0.047825		0.201008	5.05e-05	0.000162
0.573605	0.825447	0.483953		0.13779	0.043993	0.233941		0.012943	0.113892	0.04241		0.267497	0.000415	5.77e-05
0.566656	0.768964	0.574743		0.392129	0.128696	0.409177		0.022321	0.086371	0.042256		0.000576	6.49e-05	0.00026
0.506801	0.850672	0.624749		0.442692	0.041356	0.309306		0.023534	0.087782	0.048849		0.006983	8.67e-05	9.57e-05
0.484428	0.734546	0.634269		0.431344	0.071908	0.231078		0.021707	0.180825	0.056421		0.040814	0	0.000257

## Sheet: Fig. 5
Fig. 5A
Genus	ND1	ND2	ND3	ND4	ND5	ND6	HFD1	HFD2	HFD3	HFD4	HFD5	HFD6	TPE1	TPE2	TPE3	TPE4	TPE5	TPE6
g__A2	0	0	0	1.99e-05	0	0	0	0.00146376	0	6.49e-05	0.00110485	0.000249444	4.23e-05	0.000229568	0.000270356	7.15e-05	0	7.14e-05
g__Faecalibaculum	0.222758	0.12979	0.260479	0.18398	0.184261	0.219273	0.208941	0.122199	0.150699	0.398325	0.27669	0.295637	0.245837	0.192091	0.0804082	0.0242891	0.0562232	0.0680577
g__Ileibacterium	0.113175	0.0813207	0.123345	0.22271	0.0297921	0.0315438	0.0309838	0.012871	0.0201633	0.0447272	0.0457539	0.0560796	0.449493	0.480286	0.611679	0.114056	0.209576	0.388088
g__Coriobacteriaceae UCG_002	0.00611604	0.00282875	0.00281259	0.307718	0.0125427	0.00790263	0.192284	0.0201393	0.0923355	0.064981	0.0698224	0.163363	0.0699281	0.0452537	0.0383229	0.453078	0.419583	0.311802
Others	0.0903097	0.218955	0.107589	0.0817113	0.117591	0.106769	0.189317	0.190238	0.218228	0.113473	0.207799	0.0913193	0.0965131	0.103019	0.0780877	0.0424761	0.0650719	0.0623639
g__uncultured bacterium	0.231119	0.0699344	0.0976489	0.0724358	0.243276	0.269723	0.0148377	0.0930749	0.0266155	0.0280762	0.0230503	0.038097	0.0292688	0.0152663	0.012549	0.0286749	0.0147541	0.00437297
g__Blautia	0.00951072	0.0276219	0.00942082	0.00238341	0.0837902	0.0248083	0.0766457	0.159196	0.0631049	0.0904281	0.0912695	0.160143	0.0315089	0.0459711	0.0430091	0.00698401	0.0932491	0.0975975
g__Akkermansia	0.20225	0.20096	0.267497	0.000575991	0.00698252	0.0407136	6.38e-05	5.05e-05	0.000415485	3.25e-05	6.5e-05	0	0.00023246	0.000286961	6.76e-05	0.08295	0.00230592	0.000356977
g__Romboutsia	0.0194142	0.0108396	0.00912045	0.0141416	0.00263784	0.0063021	0.0607869	0.137896	0.13975	0.0217793	0.0540295	0.0632682	0.00629755	0.00840794	0.000405533	0.00176388	0.00196847	0.00406954
g__Intestinimonas	0.0103524	0.0355615	0.0196062	0.00407166	0.00781008	0.0209403	0.0501611	0.0101958	0.0291084	0.00973741	0.0450823	0.00904803	0.00386729	0.00324265	0.00504664	0.00486258	0.00142479	0.00476564
g__Helicobacter	0.000112221	0	0.000191147	1.99e-05	2.59e-05	3.33e-05	3.19e-05	0.000151423	0.00271288	3.25e-05	4.33e-05	4.54e-05	0.000845309	0.000344353	6.76e-05	0.150692	0.055417	0.0108878
g__Ruminiclostridium	0.00412412	0.0294285	0.00464215	0.00256217	0.0183873	0.0173058	0.025272	0.00893398	0.0179636	0.0105164	0.0230719	0.0116105	0.00152155	0.00401745	0.00732213	0.00626892	0.0107422	0.00078535
g__Bacteroides	0.00813601	0.0134069	0.004451	0.00194645	0.065015	0.0143381	0.00481828	0.0539572	0.00312836	0.00954267	0.00184142	0.00587328	0.00169062	0.00123393	0.00214031	0.00145401	0.00161227	0.00116018
g__Alloprevotella	0.00165526	0.00282875	0.00374102	0.000178756	0.0708338	0.0828276	0.00102109	0.000403796	0.000464366	0.0244409	0.000888215	0.000544242	0.000105664	0.000430441	0.000315415	0.000214526	0.000524925	0.000214186
g__Enterorhabdus	0.00224442	0.00230579	0.00264875	0.00585922	0.00424123	0.00463488	0.0146782	0.0351807	0.0147375	0.0120744	0.0112218	0.0114518	0.00462806	0.00424702	0.00581264	0.00951064	0.00328078	0.0024096
g__Lactobacillus	0.00123443	0.00137872	0.00245761	0.00117184	0.00144823	0.00146716	0.00312709	0.00297799	0.0063056	0.00470642	0.00595754	0.0093655	0.00845309	0.00935491	0.0286577	0.0267919	0.0173788	0.0165102
g__Lachnospiraceae NK4A136 group	0.0056391	0.0106732	0.0064717	0.0156113	0.0139133	0.0126709	0.00516928	0.00964062	0.0105338	0.00678373	0.0261265	0.00859449	0.0010989	0.00324265	0.0054747	0.00264582	0.00181849	0.000803199
g__Alistipes	0.0133543	0.0196111	0.0081101	0.00139032	0.0186459	0.011137	0.00149973	0.0252877	0.00405709	0.0132104	0.00335789	0.0050796	0.00333897	0.00200872	0.00702924	0.00100112	0.0010686	0.000838896
g__Roseburia	0.0013186	0.00173529	0.00180225	0.000814332	0.00243095	0.00806936	0.0283353	0.00292752	0.017817	0.0200591	0.0136915	0.00369631	0.000950972	0.0118515	0.0164692	0.00109647	0.00157477	0.00108878
g__uncultured	0.00232858	0.0187316	0.00393217	0.000993088	0.00907727	0.00736912	0.0116468	0.00847971	0.0152752	0.0100945	0.0162045	0.00530636	0.00118343	0.00278352	0.00540711	0.00488642	0.0031308	0.00144576
g__Dubosiella	0.00185164	0.00204431	0.0032222	0.0209144	0.0056636	0.00583528	0.013689	0.00287704	0.00691661	0.00152553	0.00155979	0.00226768	0.0146027	0.0242769	0.000788537	0.00293185	0.00944864	0.00783565
g__Ruminococcaceae UCG_014	0.000981932	0.000427879	0.000409601	0.00222452	0.00442226	0.006002	0.00446728	0.0019685	0.0883762	0.00340809	0.00255633	0.000929747	6.34e-05	0.000114784	0.000901185	0	1.87e-05	0
g__Parabacteroides	0.00765907	0.0200628	0.0137626	0.000635576	0.00470673	0.0039013	0.000702001	0.0145366	0.00149086	0.0156448	0.00168977	0.00428591	0.000803043	0.000459137	0.00529446	0.000143017	0.00028121	0
g__Bifidobacterium	0.00387162	0.00546734	0.00570711	0.0257607	0.00437054	0.00653551	0.000829637	0.00393701	0.00256623	0.00619949	0.00320624	0.00244909	0.000549451	0.00387397	0.00234308	0.00219293	0.00198721	0.00105308
g__Rikenellaceae RC9 gut group	0.00134665	0.00482552	0.00144726	0.000635576	0.00152581	0.00226742	0.00181882	0.00302847	0.00295728	0.030186	0.00701906	0.00893465	0.00374049	0.000631313	0.00184743	0	0	1.78e-05
g__Ruminiclostridium 9	0.00356301	0.0111248	0.00740013	0.00226424	0.00755146	0.00656886	0.00347809	0.00282657	0.00244403	0.00321335	0.00431109	0.00174611	0.0012891	0.00103306	0.00108142	0.000381379	0.000299957	0.000196337
g__uncultured Bacteroidales bacterium	0.00224442	0.00454027	0.00273067	0.000575991	0.0136547	0.0139046	0.001053	0.0073188	0.00202855	0.000746535	0.00236135	0.00401379	0.00124683	0.000200872	0.00103636	0.000858103	0.000506177	0.000285582
g__Lachnoclostridium	0.000785546	0.00297138	0.00114688	0.00111226	0.00493949	0.00283428	0.00446728	0.00817686	0.0103138	0.00480379	0.00463605	0.00312939	0.000401522	0.00123393	0.00394268	0.00174004	0.00114359	0.000731803
g__Oscillibacter	0.00159915	0.0127175	0.00456023	0.000417097	0.00543085	0.00376792	0.00319091	0.00146376	0.00344609	0.0036353	0.00307626	0.00172343	0.000718512	0.000918274	0.00150949	0.00154935	0.0013873	0.000660408
g__Acetatifactor	0.00109415	0.00910431	0.000873816	0.000198618	0.00157753	0.00166722	0.002457	0.000757117	0.000293284	0.0136324	0.00132149	0.00199555	0.00135249	0.00404614	0.00664624	0.000977284	9.37e-05	0.000124942
g__Ruminococcaceae UCG_004	0.00151498	0.00475421	0.00141995	0.000158894	0.00372401	0.00343448	0.00376528	0.00353321	0.00564571	0.00266156	0.00361785	0.00344687	0.000676247	0.00117654	0.00162213	0.00238362	0.00236216	0.00169564
g__Bilophila	0.000420828	0.0107445	0.00103766	3.97e-05	0.00323265	0.00113371	0.00363764	0.00176661	0.0031528	0.00236944	0.00348787	0.00176879	0.000655114	0.00109045	0.00211779	0.00483875	0.00346825	0.00205262
g__Clostridium sensu stricto 1	0.00272136	0.00218694	0.00128342	0.00875904	0.00387918	0.00563521	0.000893455	0.000706642	0.000855411	0.00016229	0.000606586	0.000725656	2.11e-05	8.61e-05	0.000135178	0	0	3.57e-05
g__Tyzzerella	0.000364718	0.00104593	0.000245761	0.000417097	0.00274128	0.000766922	0.00242509	0.00161518	0.0049125	0.00126586	0.00396447	0.00217697	0.000718512	0.00114784	0.00245573	0.00102496	0.000581166	0.000142791
g__Methylobacterium	0.00232858	0.00156889	0.00150187	0.000993088	0.00137064	0.00186729	0.00191455	0.00252372	0.000928732	0.0013957	0.0014948	0.000816364	0.00152155	0.00200872	0.00103636	0.00162086	0.000374946	0.000713954
g__Streptococcus	0.00100999	0.00116478	0.00174763	0.00174784	0.00108617	0.000866956	0.00137209	0.00338179	0.000904292	0.00103866	0.0047227	0.00170076	0.000950972	0.00014348	0.000878655	0.000953448	0.000712398	0.000232035
g__Ruminococcaceae UCG_010	0.000140276	0.000142626	0.000273067	0.000854056	0.000646529	0.0015005	0.000542455	0.00166566	0.00332388	0.000486871	0.00385615	0.00335616	0.00215554	0.0021522	0.000766007	0.000881939	0.000262462	0.000249884
g__Muribaculum	0.00288969	0.00130741	0.000873816	0.00115198	0.00447398	0.00286762	0.000223364	0.00100949	0.000439926	0.00172028	0.000498267	0.00122455	4.23e-05	0	0.000540711	0.000333707	0.000262462	3.57e-05
g__Prevotella 7	0.00115026	0.000760673	0.00147456	0.000734885	0.00116375	0.0018006	0.00165927	0.00166566	0.00197967	0.000746535	0.00121317	0.000793687	0.000824176	0.00123393	0.000946244	0.000143017	0.000299957	0
g__Neisseria	0.000841656	0.00068936	0.000300374	0.0006753	0.000827558	0.00136712	0.002457	0.000504745	9.78e-05	0.000649161	0.00272964	0.000408182	0.000929839	0.00249656	0.000292885	0.000667414	0.00196847	0
g__Ruminococcaceae NK4A214 group	0.0013186	0.00282875	0.000928429	0.000575991	0.000956864	0.00153385	0.00121255	0.00171613	0.00215075	0.000227206	0.00116984	0.00129258	0.000633981	0.00014348	0.000202767	0	0	1.78e-05
g__Lachnospiraceae NK4B4 group	0.000140276	0.000118855	8.19e-05	7.94e-05	5.17e-05	0.0009003	0.00153164	0.00741975	0.00185746	0	0.00244801	0.000975101	0	0	0.00058577	0.00019069	3.75e-05	1.78e-05
g__uncultured organism	0.000617215	0.000713131	0.000491521	0.000297926	0.00687907	0.00686896	0	0	0	0	0	0	0	0	0.000135178	0	1.87e-05	0
g__Haemophilus	0.000504994	0.000356566	0.000300374	0.000158894	0.000258612	0.00233411	0.00159546	0.00111044	0.000415485	0.000584245	0.0012565	0.000680303	0.000105664	0.00203742	0.000653359	0.0011203	0.00129356	0.000124942
g__GCA_900066575	5.61e-05	0.00137872	0.000136534	1.99e-05	0.000103445	0.000533511	0.00194646	0.00090854	0.00105093	0.00126586	0.00168977	0.000634949	4.23e-05	0.000401745	0.000901185	0.000619741	0.000806134	1.78e-05
g__Eisenbergiella	0.000364718	0.00473044	0.00114688	0.000119171	0.00212062	0.00286762	3.19e-05	0	7.33e-05	0	2.17e-05	0	0	5.74e-05	0.000473122	0.000238362	9.37e-05	1.78e-05
g__Escherichia_Shigella	0.000757491	4.75e-05	8.19e-05	1.99e-05	0.000232751	0.00140047	0.000223364	5.05e-05	0.000293284	0.000876367	0.000671577	0.00161005	0.000147929	0.00180785	0.000292885	0.000595905	0.000431188	0.00146361
g__Veillonella	0.000196386	0.000760673	0.00103766	0.000397235	0.000620668	0.00103368	0.000861546	0.00116091	0.000708769	0.00032458	0.000519931	0.000136061	0.000316991	0.000487833	0.000405533	0.00019069	0.000149978	1.78e-05
g__Faecalibacterium	0.000308607	0.00023771	8.19e-05	0.000317788	0.000336195	0.000633545	0.000510546	0.00272562	0.000146642	0.00123341	2.17e-05	4.54e-05	0.000422654	0.000344353	0.000653359	7.15e-05	0.00048743	0.000392675
g__Prevotella	0.000364718	0.000380337	0.000573441	0.000297926	0.000336195	0.00103368	0.000925365	0.00121139	0.000293284	0.000357039	0.000671577	0.000294798	4.23e-05	0.000860882	0.000157707	0.000214526	0.000374946	0
g__Ruminococcaceae UCG_005	0.000112221	0.000166397	0.000245761	3.97e-05	0.000181028	0.000366789	0.00236127	0.00343226	0.000342164	0.000194748	0.000411612	0	2.11e-05	5.74e-05	0	0	0	0
Fig. 5B
HFD	ND	TPE	MeanDecreaseGini	id
3.94674	5.60647	5.31634	0.87079	g__Clostridium sensu stricto 1
7.21637	4.2592	3.10176	0.778759	g__Enterorhabdus
2.39761	6.18604	4.21368	0.724939	g__Lactobacillus
2.65748	3.84789	5.69626	0.651314	g__Ruminiclostridium 9
4.46156	0.513605	2.99838	0.626886	g__Romboutsia
4.27562	6.28178	3.15289	0.583404	g__uncultured organism
0.722064	4.70904	3.78177	0.46527	g__uncultured bacterium
-0.625468	3.45673	3.85387	0.373173	g__Muribaculum
1.6621	3.33664	0.99112	0.361652	g__Eisenbergiella
3.97156	2.90435	0.654934	0.353984	g__Akkermansia
1.81333	0.696211	3.63302	0.320697	g__Ruminococcaceae NK4A214 group
3.55803	-0.74177	2.92666	0.306767	g__Ileibacterium
0.361853	2.32045	4.01724	0.303153	g__Bacteroides
-1.50227	2.82364	2.39703	0.298997	g__Bifidobacterium
0.653032	2.58261	4.00172	0.283334	g__Lachnospiraceae NK4A136 group
-0.607201	1.81502	3.33545	0.251376	g__Ruminococcaceae UCG_005
3.0608	-0.479919	3.58709	0.239555	g__Ruminococcaceae UCG_004
2.56598	-1.19694	3.29342	0.222566	g__Intestinimonas
-0.412639	-0.891441	2.34404	0.219015	g__Oscillibacter
3.16281	-0.171785	2.78691	0.216235	g__Ruminococcaceae UCG_014
Fig. 5C
OTU ID	gazing	OTU_3	OTU_2	OTU_19	OTU_540	OTU_11	OTU_151	OTU_37	OTU_3320	OTU_70	OTU_8	OTU_44	OTU_26	OTU_25	OTU_3436	OTU_14	OTU_245	OTU_1	OTU_1495	OTU_105	OTU_678	OTU_75	OTU_28	OTU_1187	OTU_16	OTU_24	OTU_1125	OTU_43	OTU_707	OTU_2367	OTU_5707	OTU_48	OTU_474	OTU_41	OTU_33	OTU_114	OTU_88	OTU_121	OTU_112	OTU_311	OTU_2610	OTU_242	OTU_315	OTU_3685	OTU_146	OTU_107	OTU_68	OTU_234	OTU_4809
ND_1	ND	100	6299	15	14	312	24	14	1	16	692	13	4	42	1066	321	5	3757	1397	0	0	42	130	0	240	12	1	29	0	0	1	89	4	9	135	16	1	51	0	0	1	3	1	2	2	5	96	1	0
ND_2	ND	49	4634	447	26	1102	29	0	11	177	456	44	123	191	502	1190	3	3245	642	0	0	65	1043	4	818	124	0	58	1	0	10	21	9	89	31	15	15	29	2	1	13	7	28	0	28	5	92	43	0
ND_3	ND	60	7701	38	17	313	10	104	3	105	334	9	41	40	1163	619	2	4234	1601	4	0	24	129	0	490	27	0	60	0	2	0	23	1	9	20	11	9	33	14	1	3	25	9	0	0	3	47	15	0
ND_4	ND	10467	7013	1	1	61	18	95	1	25	712	21	1	29	1675	116	9	10592	1946	1	59	31	95	1	23	24	0	20	4	9	0	12	0	2	29	7	2	40	0	0	0	14	2	36	0	4	441	3	0
ND_5	ND	220	6417	122	20	671	17	50	3	219	102	104	67	43	249	215	34	1085	483	6	5	37	570	0	146	78	0	82	3	0	0	2	6	238	63	8	25	131	0	0	3	4	39	2	2	2	150	19	0
ND_6	ND	140	5780	34	103	446	40	49	0	39	189	23	15	57	284	499	42	882	580	8	0	108	467	1	94	41	0	231	1	2	0	1	28	168	92	70	19	84	1	0	1	11	18	3	4	27	169	13	0
HFD_1	HFD	6001	5776	114	70	2307	64	573	6	116	1905	76	193	55	374	1406	5	884	571	20	17	59	295	6	22	445	12	842	16	5	14	50	164	47	23	49	53	17	156	64	25	20	2	13	29	48	28	9	1
HFD_2	HFD	398	2111	35	4	4	6	544	0	13	2732	32	313	55	87	174	0	244	195	15	0	156	29	4	272	107	4	11	6	1	0	98	1	25	116	9	60	0	145	131	1	6	0	2	2	147	14	2	0
HFD_3	HFD	3744	5668	129	33	2385	3	607	13	62	5718	201	1487	119	147	1102	1	784	270	47	8	178	289	7	58	202	13	258	13	10	83	57	50	194	52	17	83	86	272	76	8	22	0	12	9	76	35	1	2
HFD_4	HFD	2000	10862	72	7	23	18	15	0	39	671	39	38	924	683	217	5	1265	1185	1	0	0	127	0	413	113	1	503	9	5	0	384	6	21	24	17	25	0	0	1	0	10	0	4	4	0	5	2	0
HFD_5	HFD	3213	11587	161	48	22	67	328	0	201	2494	183	1970	319	529	1947	0	1988	831	52	1	45	97	6	70	630	4	328	11	3	0	48	5	269	240	55	104	42	68	279	0	24	0	10	6	113	28	4	0
HFD_6	HFD	7180	11466	78	23	13	9	68	0	56	2790	96	97	388	803	328	1	2316	1166	22	5	147	189	2	175	194	5	143	5	1	0	147	1	105	237	23	37	42	1	19	0	6	0	14	0	43	32	9	0
TPE_1	TPE	4312	1810	14	2	3	0	10	0	6	1346	47	1	18	398	60	0	4130	449	6	47	0	32	1	5	4	3	35	1	5	0	11	0	7	93	0	3	0	0	6	0	1	0	16	0	0	10	0	0
TPE_2	TPE	3448	5072	27	1	11	0	2	0	114	2705	17	49	28	850	111	0	7894	892	36	16	0	161	2	7	5	1	20	1	4	0	1	0	17	7	0	8	0	19	2	0	0	0	4	10	0	26	9	0
TPE_3	TPE	3927	10586	79	2	4	0	14	0	35	441	29	89	17	930	141	0	2823	1249	5	14	3	60	0	0	97	1	270	11	0	0	3	1	22	8	0	6	0	1	26	0	0	0	3	4	0	13	5	0
TPE_4	TPE	2916	18137	89	4	15	0	4	0	132	1354	50	72	53	577	496	11	1529	924	15	15	0	150	1	7	56	3	329	13	7	0	30	1	87	46	0	10	0	0	8	0	0	4	16	5	1	52	1	0
TPE_5	TPE	598	6418	234	71	0	0	16	0	106	3710	33	30	49	573	569	6	4675	848	57	10	2	82	0	20	48	4	96	0	4	0	18	0	91	109	0	33	0	0	11	0	2	1	17	0	0	2	2	0
Fig. 5D
Enterorhabdus				Lactobacillus				Romboutsia				Ileibacterium
ND	HFD	TPE		ND	HFD	TPE		ND	HFD	TPE		ND	HFD	TPE
0.002244	0.014678	0.004628		0.001234	0.003127	0.008453		0.001234	0.003127	0.008453		0.113175	0.0309838	0.149235
0.002306	0.035181	0.004247		0.001379	0.002978	0.009355		0.001379	0.002978	0.009355		0.0813207	0.012871	0.189944
0.002649	0.014738	0.005813		0.002458	0.006306	0.028658		0.002458	0.006306	0.028658		0.123345	0.0201633	0.0880683
0.005859	0.012074	0.009511		0.001172	0.004706	0.026792		0.001172	0.004706	0.026792		0.22271	0.0447272	0.0346937
0.004241	0.011222	0.003281		0.001448	0.005958	0.017379		0.001448	0.005958	0.017379		0.0297921	0.0457539	0.116382
0.004635	0.011452	0.00241		0.001467	0.009366	0.01651		0.001467	0.009366	0.01651		0.0315438	0.0560796	0.199916
Akkermansia				Blautia				Roseburia				Dubosiella
ND	HFD	TPE		ND	HFD	TPE		ND	HFD	TPE		ND	HFD	TPE
0.20225	6.38e-05	0.00023246		0.00951072	0.0766457	0.0315089		0.001319	0.028335	0.001235		0.00185164	0.013689	0.0123533
0.20096	5.05e-05	0.000286961		0.0276219	0.159196	0.0459711		0.001735	0.002928	0.00051		0.00204431	0.00287704	0.0132195
0.267497	0.000415	6.76e-05		0.00942082	0.0631049	0.0430091		0.001802	0.017817	0.007956		0.0032222	0.00691661	0.0487474
0.000576	3.25e-05	0.08295		0.00238341	0.0904281	0.00698401		0.000814	0.020059	0.007486		0.0209144	0.00152553	0.0428953
0.006983	6.5e-05	0.00230592		0.0837902	0.0912695	0.0932491		0.002431	0.013692	0.002488		0.0056636	0.00155979	0.0105497
0.040714	0	0.000356977		0.0248083	0.160143	0.0975975		0.008069	0.003696	0.001123		0.00583528	0.00226768	0.0240564
[truncated: 5,000 more columns]

## Sheet: Fig. 6
genus	ND1	ND2	ND3	HFD1	HFD2	HFD3	TPE1	TPE2	TPE3
Enterorhabdus	0.002275	0.004254	0.004438	0.0249295	0.013406	0.011337	0.0044375	0.007662	0.0028455
Lactobacillus	0.0013065	0.001815	0.0014575	0.0030525	0.005506	0.007662	0.008904	0.027725	0.0169445
Romboutsia	0.0151269	0.011631	0.00446997	0.0993416	0.0807645	0.0586488	0.00735275	0.00108471	0.003019
Ileibacterium	0.0972477	0.173027	0.030668	0.0219274	0.0324452	0.0509168	0.169589	0.061381	0.158149
Blautia	0.0185663	0.00590212	0.0542992	0.117921	0.0767665	0.125706	0.03874	0.0249965	0.0954233
Roseburia	0.001527	0.001308	0.00525	0.0156315	0.018938	0.008694	0.0008725	0.007721	0.0018055
Dubosiella	0.00194798	0.0120683	0.00574944	0.00828303	0.00422107	0.00191373	0.0127864	0.0458214	0.017303
BAs	ND1	ND2	ND3	HFD1	HFD2	HFD3	TPE1	TPE2	TPE3
CA	19.601	27.6078	4.96807	73.7475	82.5512	9.06037	53.153	83.2827	64.2444
CDCA	15.8051	18.4794	31.5027	16.984	23.6003	20.0367	29.3529	28.39	24.307
UDCA	4.83677	4.28963	6.33038	14.969	18.5253	11.4127	9.78453	10.5777	10.1811
α-MCA	59.8322	47.3121	98.4258	38.0227	43.4276	24.7958	146.035	102.713	81.2478
β-MCA	43.2862	38.456	77.917	33.3558	38.8285	15.4336	114.86	99.4501	61.4148
LCA	70.7352	69.4425	44.2717	14.1086	19.8267	23.1302	72.8953	61.4083	19.2433
DCA	175.885	174.541	200.126	115.88	172.51	105.027	180.066	173.61	169.204
TCA	3.73219	3.81627	2.50655	2.45056	3.07122	3.80333	15.6801	8.76579	9.67964
TDCA	1.24345	0.80246	2.62926	0.47384	0.53728	0.32076	1.42371	1.36965	2.35384
T-β-MCA	1.55309	1.1372	2.67815	0.57527	0.8328	0.93157	5.76691	3.21633	4.63641
TUDCA	0.40781	0.31958	0.3916	0.26596	0.31732	0.32584	0.73667	0.59116	0.45853
GLCA	0.3443	0.28807	0.17392	0.04043	0.05169	0.03888	0.19684	0.16485	0.07798
GDCA	0.82819	0.56804	1.78359	0.27911	0.41556	0.22201	1.21222	1.38168	0.65442

## Sheet: Fig. 7
Fig. 7B
	HFD-anti						TPE-anti
0	22.5	23.7	20	22	21.9	23.9	21.8	22.4	22.7	21	22.2	23.4
1	22.8	24	20.2	21.9	20.2	23.3	21.4	21.8	22.7	19.8	24.1	22.8
2	23	23.6	21.1	23.2	23.1	23.6	22.4	22.5	23	20.9	23.5	23.7
3	24.6	25.3	21.6	24	23.6	24.4	23.1	23.5	23.6	21.5	22.4	24
4	24.5	26	21.3	25.9	25	24.3	24.1	23.8	24.2	21.4	23.2	24.1
5	26.4	26.2	22.8	26.2	25.8	25.3	24	24.9	24.4	22.4	24.9	24.3
6	26.3	26.2	23.4	26.3	25.3	25.5	24.5	24.1	24.1	22.8	24.1	24.4
7	26.9	26.3	23.2	26.4	25.8	26.2	24.5	24.4	24.9	23	25.2	24.7
8	26.5	23.8	26.6	25.7	26.5	23.9	25.6	24.8	25.5	23.2	24.9	24.9
Fig. 7C
Food intake
HFD-anti	TPE-anti
1.86	1.59
3.14	3.41
2.5	2.52
2.49	2.31
2.1	2.03
2.37	2.23
Fig. 7D
Serum Lipids
	HFD+anti						TPE+anti
TC	10.68	9.748	7.926	12.78	6.22	5.83	4.418	3.394	8.677	10.98	11.4	9.611
TG	1.043	1.167	0.869	0.733	0.71	0.708	0.708	0.745	0.745	0.695	0.78	0.708
Fig. 7E
Hepatic Lipids
	HFD+anti						TPE+anti
TC	31.57	43.41	37.49	39.47	41.4	43.41	31.57	31.57	41.44	35.52	35.5	35.52
TG	113	104.7	193.9	112	168	107.8	138.9	101.6	89.16	116.1	125	108.9
Fig. 7F
Serum TBA			Liver TBA			Fecal TBA
HFD-anti	TPE-anti		HFD-anti	TPE-anti		HFD-anti	TPE-anti
17.48	15.03		97	117		505.546	382.77
10.49	16.08		122	102		258.863	313.768
13.29	13.29		170	89		225.595	210.444
22.03	15.73		89	90
12.24	15.38		130	90
15.73	16.78		104	130
Fig. 7G
PCOA analysis of fecal BAs
	HFD-anti-1	HFD-anti-2	HFD-anti-3	TPE-anti-1	TPE-anti-2	TPE-anti-3
HFD-anti-1	0	0.323415	0.38487	0.143557	0.235309	0.41249
HFD-anti-2	0.323415	0	0.0712899	0.19356	0.10342	0.104074
HFD-anti-3	0.38487	0.0712899	0	0.259705	0.166145	0.0359537
TPE-anti-1	0.143557	0.19356	0.259705	0	0.12054	0.290558
TPE-anti-2	0.235309	0.10342	0.166145	0.12054	0	0.197371
TPE-anti-3	0.41249	0.104074	0.0359537	0.290558	0.197371	0
Fig. 7H
	HFD+anti			TPE+anti
Primary BAs	495.297	252.122	220.421	373.868	307.396	206.653
secondary BAs	9.67936	6.00447	4.20478	7.86588	5.86111	3.37025
conjugated BAs	504.547	257.777	223.875	381.086	312.427	209.553
unconjugated BAs	0.99855	1.08586	1.72051	1.68394	1.34089	0.891027
Fig. 7J
Liver
	HFD+anti			TPE+anti
Cyp7a1	1	0.82	0.73	0.97	1.02	1.28
Cyp27a1	1	0.97	1.01	1.12	0.92	1.02
Bsep	1	1.01	1.02	1.01	1.09	0.98
Ntpc	1	0.92	0.87	0.93	1.02	0.96
Shp	1	0.79	0.84	0.69	0.84	1.03
Fgfr4	1	1.23	1.02	1.12	1.06	0.99
Fxr	1	0.98	0.84	0.93	1.05	1.01
Fig. 7K
Ileum
	HFD+anti			TPE+anti
Fgf15	1	0.92	0.98	0.89	0.93	0.89
Ibabp	1	1.22	1.15	0.98	1.05	1.21
Ost-β	1	1.03	1.12	0.79	0.93	0.93
Ost-α	1	1.03	0.91	0.97	0.85	1.11
Asbt	1	0.98	0.89	0.75	0.88	0.92
Fxr	1	0.79	1.17	0.93	1.02	1.04
