# Supplementary material for: Mitigation of high-fat diet-induced hepatic steatosis by thyme (Thymus quinquecostatus Celak) polyphenol-rich extract (TPE): insights into gut microbiota modulation and bile acid metabolism
Source: Royal Society of Chemistry journal article supplement (doi:10.1039/d3fo05235d), 2024-01-01
Supplement: d3fo05235d6.pdf [file d3fo05235d6.pdf]

**Table S1.** Compositions of experimental diets

|                    | ND<br>(D12450J) | HFD<br>(D12492) |
|--------------------|-----------------|-----------------|
| <b>Energy</b>      | <b>kcal%</b>    | <b>kcal%</b>    |
| Protein, kcal, %   | 20              | 20              |
| Carbohydrate       | 70              | 20              |
| Fat                | 10              | 60              |
| <b>Ingredient</b>  | <b>kcal</b>     | <b>kcal</b>     |
| Casein, 80 Mesh    | 800             | 800             |
| L-Cystine          | 12              | 12              |
| Corn Starch        | 2024.8          | 0               |
| Maltodextrin 10    | 500             | 500             |
| Sucrose            | 275.2           | 275             |
| Soybean Oil        | 225             | 225             |
| Lard               | 180             | 2205            |
| Vitamin Mix V10001 | 40              | 40              |

ND: Normal diet; HFD: High-fat diet.
