# Supplementary material for: Mitigation of high-fat diet-induced hepatic steatosis by thyme (Thymus quinquecostatus Celak) polyphenol-rich extract (TPE): insights into gut microbiota modulation and bile acid metabolism
Source: Royal Society of Chemistry journal article supplement (doi:10.1039/d3fo05235d), 2024-01-01
Supplement: d3fo05235d7.pdf [file d3fo05235d7.pdf]

**Table S2.** Bile acids standards.

| No. | Bile acid       | Full name                       |
|-----|-----------------|---------------------------------|
| 1   | CA              | Cholic acid                     |
| 2   | CDCA            | Chenodeoxycholic acid           |
| 3   | DCA             | Deoxycholic acid                |
| 4   | UDCA            | Ursodeoxycholic acid            |
| 5   | HDCA            | Hyodeoxycholic acid             |
| 6   | GCA             | Glycocholic acid                |
| 7   | GCDCA           | Glycochenodeoxycholic acid      |
| 8   | GDCA            | Chenodeoxycholic acid           |
| 9   | GUDCA           | Glycoursodeoxycholic acid       |
| 10  | GHDCA           | Glycohyodeoxycholic acid        |
| 11  | TDCA            | Taurodeoxycholic acid           |
| 12  | TCDC            | Taurochenodeoxycholic acid      |
| 13  | TUDCA           | Tauroursodeoxycholic acid       |
| 14  | THDCA           | Taurohyodeoxycholic acid        |
| 15  | GLCA            | Glycolithocholic acid           |
| 16  | LCA             | Lithocholic acid                |
| 17  | TCA             | Taurocholic acid                |
| 18  | TLCA            | Taurolithocholic acid           |
| 19  | $\beta$ -MCA    | $\beta$ -Muricholic acid        |
| 20  | $\gamma$ -MCA   | $\gamma$ -muricholic acid       |
| 21  | T- $\beta$ -MCA | Tauro- $\beta$ -muricholic acid |
| 22  | 7-KLCA          | 7-Ketolithocholic acid          |
| 23  | 12-KLCA         | 12-ketolithocholic acid         |
| 24  | ApCA            | Apocholic acid                  |
| 25  | 3-DHCA          | 3-dehydrocholic acid            |
| 26  | 7-KDCA          | 7-ketodeoxycholic acid          |
| 27  | 6,7-DKLCA       | 6,7-diketolithocholic acid      |
| 28  | MoCA            | murocholic acid                 |

|    |               |                           |
|----|---------------|---------------------------|
| 29 | IsoLCA        | Isolithocholic acid       |
| 30 | AlloCA        | Allocholic acid           |
| 31 | $\alpha$ -MCA | $\alpha$ -Muricholic acid |

---
